# Supplementary material for: A TbPc2 sub-monolayer deposit on a titanium dioxide ultrathin film: magnetic, morphological, and chemical insights
Source: Royal Society of Chemistry journal article supplement (doi:10.1039/d1tc03408a), 2021-01-01
Supplement: d1tc03408a1.pdf [file d1tc03408a1.pdf]

## Electronic Supplementary Information (ESI)

# A TbPc<sub>2</sub> sub-monolayer deposit on Titanium Dioxide ultrathin film: a magnetic, morphological, and chemical insight

Andrea Luigi Sorrentino,<sup>a,b</sup> Irene Cimatti,<sup>b</sup> Giulia Serrano,<sup>\*a,b</sup> Lorenzo Poggini,<sup>\*b,c</sup>  
Brunetto Cortigiani,<sup>b</sup> Luigi Malavolti,<sup>d,e</sup> Edwige Otero,<sup>f</sup> Philippe Saintavit,<sup>f,g</sup> Matteo Mannini,<sup>b</sup> Roberta Sessoli,<sup>b</sup>  
Andrea Caneschi.<sup>a</sup>

- a. DIEF – Department of Industrial Engineering and INSTM Research Unit, University of Florence, Via S. Marta 3, I-50139 Florence, Italy  
E-mail: giulia.serrano@unifi.it
- b. DICUS – Department of Chemistry “Ugo Schiff” and INSTM Research Unit, University of Florence, I-50019 Sesto Fiorentino (FI), Italy.
- c. ICCOM-CNR, via Madonna del Piano 10, 50019 Sesto, Fiorentino, Italy.  
E-mail: lpoggini@iccom.cnr.it
- d. Institute for Functional Matter and Quantum Technologies, University of Stuttgart, 70569 Stuttgart, Germany.
- e. Max Planck Institute for Solid State Research, 70569 Stuttgart, Germany
- f. Synchrotron SOLEIL, L’Orme des Merisiers, Saint Aubin, France.
- g. IMPMC, UMR7590 CNRS, Sorbonne Université, MNHN, Paris, France

## XPS characterization

The  $O1s$  and  $Ti2p$  spectra were acquired to evaluate the stoichiometry of the  $TiO_2$  film before and after the  $TbPc_2$  deposition. The  $O1s$  region was characterized by three components (see **Figure S1**): the main peak at 530.75 eV was given by the oxygen atoms bonded with  $Ti^{IV}$  species, the components at 532.5 eV were attributed to the presence of  $Ti^{III}$  sites<sup>1</sup> while the one at 534.0 eV was due to a very small amount of hydroxyl groups<sup>2</sup> or water molecules<sup>3</sup> absorbed on the surface.

The  $Ti^{IV}2p_{3/2}$  component was calibrated to 459.3 eV (filled in yellow in **Figure 1a**) and its relative spin-orbit coupling component ( $Ti^{IV}2p_{1/2}$ ) was shifted by 5.7 eV in agreement with the values reported in the literature.<sup>4,5</sup> At 457.5 eV a small component due to the presence of  $Ti^{III}$  species<sup>1,4</sup> (filled in green, less than 5% of the total areas) was observed with its relative spin-orbit component shifted by 5.2 eV.<sup>5,6</sup> An additional shake-up component of the main  $Ti^{IV}$  component was found at 459.8 eV (filled in dark red in **Figure 1a**) plus the relative spin-orbit coupling contribution at 465.5 eV.<sup>7,8</sup> No change in the signal is observed after the molecular deposition.

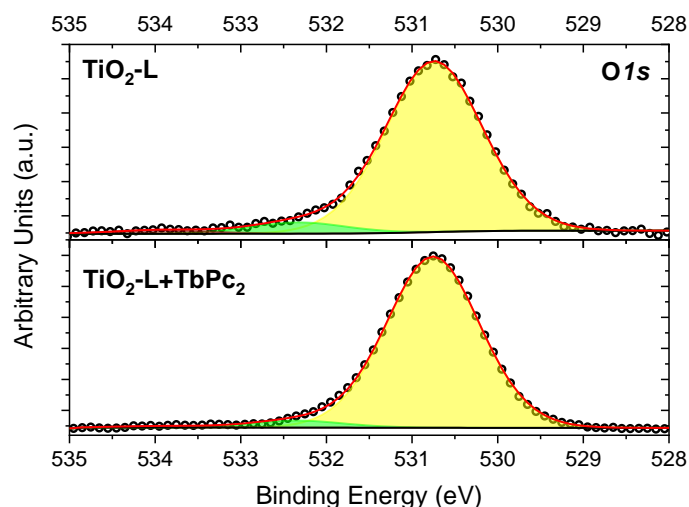

**Figure S1.** XPS spectra showing the  $O1s$  regions before and after the  $TbPc_2$  deposition on  $TiO_2-L$ . Circles are the experimental XPS data, the red line is the XPS fit and filled areas are the fit deconvolution components.

**Table S1.** Chemical semi-quantitative analysis was obtained by XPS measurements of  $TiO_2$  growth on  $Ag(100)$  before and after the  $TbPc_2$  deposition.

|                                     | Ti    | O     | Ti/O |
|-------------------------------------|-------|-------|------|
| <b>Theoretical values</b>           | 33.3% | 66.7% | 0.5  |
| <b><math>TiO_2-L</math></b>         | 29.3% | 70.7% | 0.4  |
| <b><math>TiO_2-L+ TbPc_2</math></b> | 28.8% | 71.4% | 0.4  |

## LEED and STM characterization

The crystallographic structure of the  $\text{TiO}_2$  was investigated by LEED pattern, as a function of the energy, see in **Figure S2a** and **Figure S2c**. The cell parameters obtained from the LEED pattern analysis are  $a=0.362$  nm and  $b=0.289$  nm, in close agreement with the literature.<sup>9,10</sup> The simulated LEED patterns (**Figure S2b** and **Figure S2d**) of the  $\text{TiO}_2$ -L structure were obtained by entering the cell parameters extracted from the LEED analysis in the LEEDpat42 software. The simulated images show two rectangular domains (red and blue circles on **Figure S2b** and **Figure S2d**) of the  $\text{TiO}_2$ -L structure that are fully comparable with the experimental one (**Figure S2a** and **Figure S2c**).

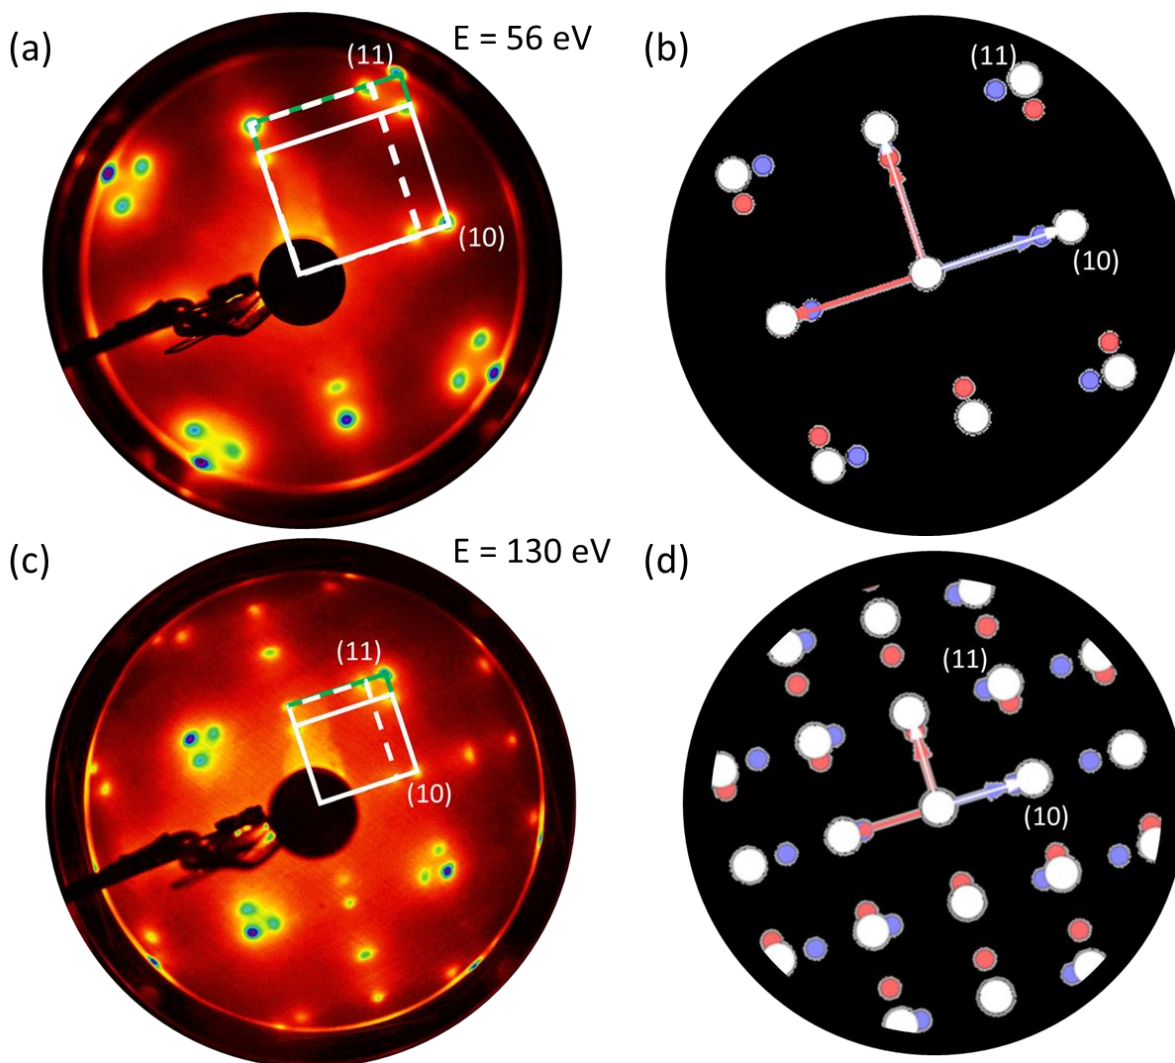

**Figure S2.** LEED patterns acquired as a function of the energy showing the surface structure of the  $\text{TiO}_2$ -L single layer growth on Ag(100), (a) 56 eV, and (c) 130 eV. In both LEED images the green square marks the Ag(100) reconstruction. The two rectangular domains related to the  $\text{TiO}_2$  lepidocrocite-like phase and rotated by  $90^\circ$  to each other, are marked in white. The simulated patterns of the lepidocrocite-like structure are reported for the two different energies: (b) 56 eV and (d) 130 eV. The red and blue circles identify the two rectangular domains of the  $\text{TiO}_2$ -L structure, while the white circles correspond to the Ag(100) unit cell.

i. TiO<sub>2</sub>-L

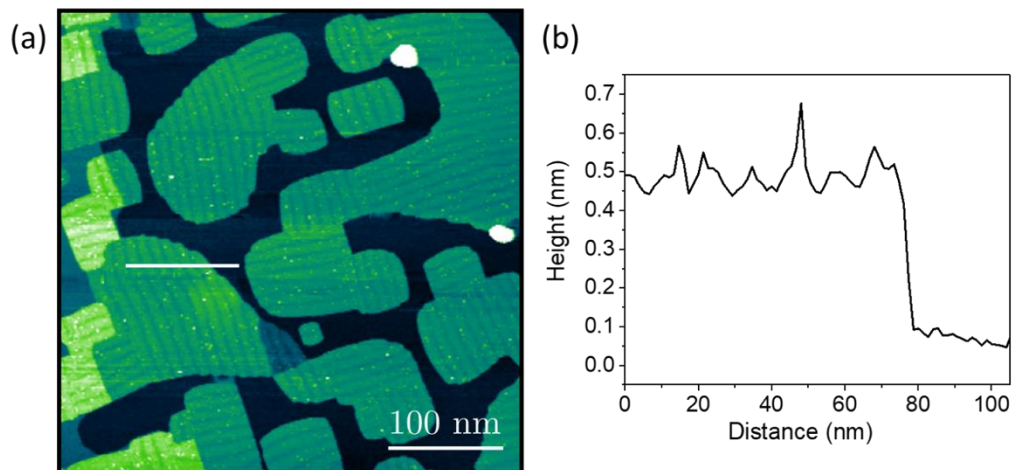

**Figure S3.** (a) STM image of the TiO<sub>2</sub>-L islands. The estimated coverage is about 0.8 ML obtained by STM measure. (b) Line profile of a TiO<sub>2</sub>-L island.

ii. TbPc<sub>2</sub> on TiO<sub>2</sub>-L

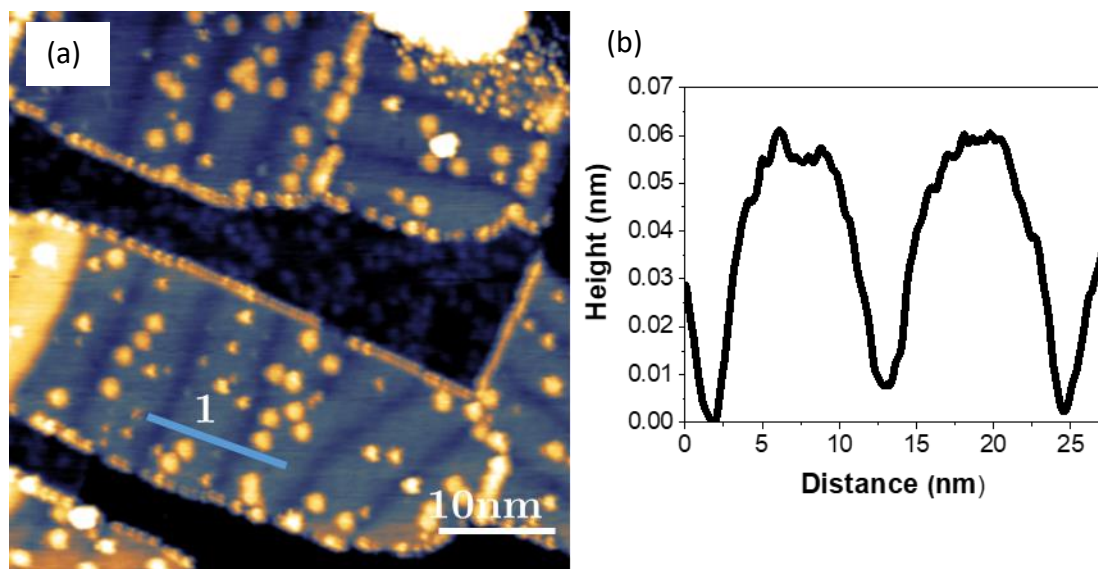

**Figure S4.** (a) STM image of the TbPc<sub>2</sub> molecular deposit on TiO<sub>2</sub>-L islands. (b) Line Profile (1) of a TiO<sub>2</sub>-L+TbPc<sub>2</sub> island.

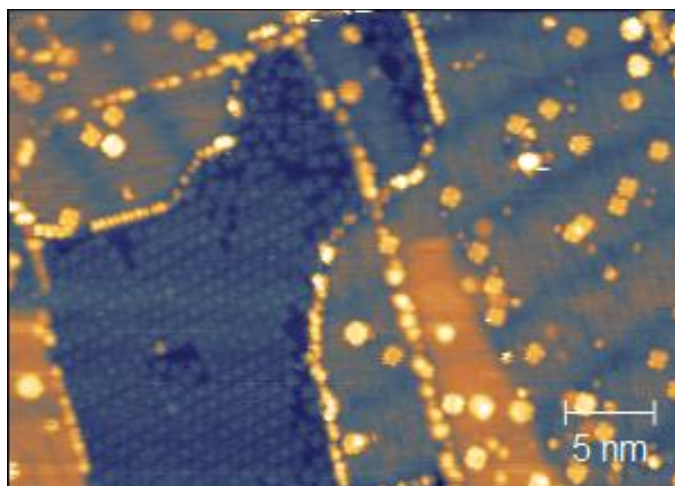

**Figure S5.** STM Image of TiO<sub>2</sub>-L+TbPc<sub>2</sub> surface with a magnification on uncovered Ag(100) surface.

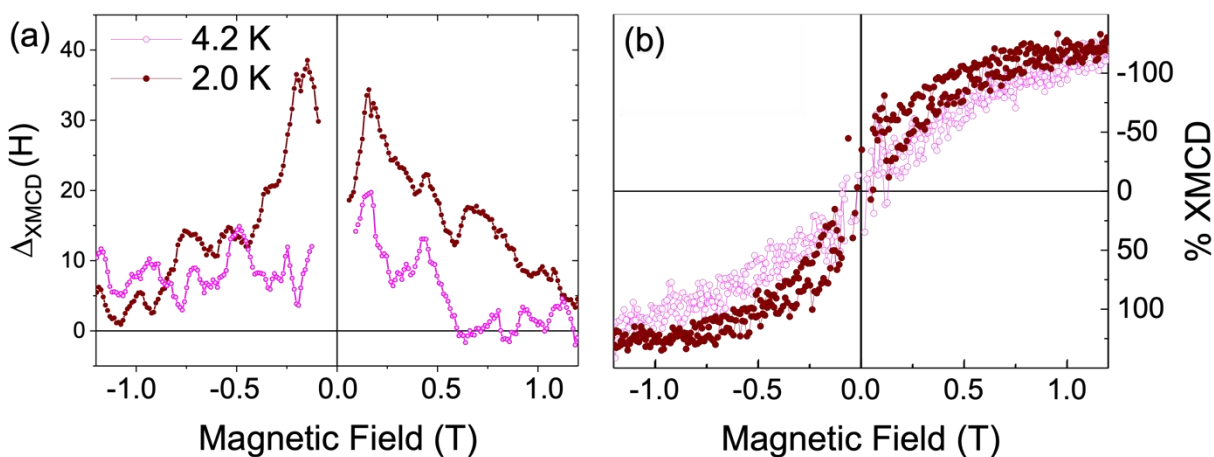

**Figure S6.** (a) Hysteresis opening estimated as  $\Delta_{\text{XMCD}}(H)$  by plotting the difference of the maximum of the XMCD signals obtained for the up and down hysteresis branches:  $\Delta_{\text{XMCD}}(H) = \text{XMCD}(H\uparrow) - \text{XMCD}(H\downarrow)$ . (b) magnetic hysteresis loop recorded at 4.2K and 2.0 K (see main text).

## References

- 1 M. J. Jackman, A. G. Thomas and C. Muryn, *J. Phys. Chem. C*, 2015, **119**, 13682–13690.
- 2 C. Fan, C. Chen, J. Wang, X. Fu, Z. Ren, G. Qian and Z. Wang, *Sci. Rep.*, 2015, **5**, 11712.
- 3 B. Zhou, X. Jiang, Z. Liu, R. Shen and A. V. Rogachev, *Mater. Sci. Semicond. Process.*, 2013, **16**, 513–519.
- 4 J. T. Mayer, U. Diebold, T. E. Madey and E. Garfunkel, *J. Electron Spectros. Relat. Phenomena*, 1995, **73**, 1–11.
- 5 W. S. Oh, C. Xu, D. Y. Kim and D. W. Goodman, *J. Vac. Sci. Technol. A Vacuum, Surfaces, Film.*, 1997, **15**, 1710–1716.

- 6 G. Serrano, A. L. Sorrentino, L. Poggini, B. Cortigiani, C. Goletti, R. Sessoli and M. Mannini, *Phys. Chem. Chem. Phys.*, 2021, **23**, 12060–12067.
- 7 S. K. Sen, J. Riga and J. Verbist, *Chem. Phys. Lett.*, 1976, **39**, 560–564.
- 8 K. S. Kim and N. Winograd, *Chem. Phys. Lett.*, 1975, **31**, 312–317.
- 9 H. Kaneko, M. Ono, K. Ozawa and K. Edamoto, *Solid State Commun.*, 2007, **142**, 32–35.
- 10 A. Atrei, A. M. Ferrari, D. Szieberth, B. Cortigiani and G. Roviida, *Phys. Chem. Chem. Phys.*, 2010, **12**, 11587.
